# Supplementary material
Source: PubMed Central journal article supplement (PMC2843555)
Supplement: NIHMS187574-supplement-1.pdf [file NIHMS187574-supplement-1.pdf]

## Supplementary Material

### Appendix A. Supplementary date

Supplementary Fig S1-S13. mRNA expression of NOX isoforms and accessory genes in human tumours and adjacent non-malignant tissues relative to 18S rRNA levels. Of 237 clinical samples from 13 different malignancies, equal numbers of tumour and adjacent non-malignant tissue specimens were obtained from 14 patients with moderately- to poorly-differentiated colorectal adenocarcinoma (Figure 1), 14 patients with moderately- to poorly-differentiated non-small cell lung cancer (Figure 2), eight patients with primary hepatocellular cancer (Figure 3), eight patients with moderately- to poorly-differentiated renal cell cancer (Figure 4), 17 patients with moderately- to poorly-differentiated prostate adenocarcinoma (Figure 5), nine patients with moderately- to poorly-differentiated gastric adenocarcinoma (Figure 6), 12 patients with moderately- to poorly-differentiated infiltrating ductal carcinoma of the breast (Figure 8) and 10 patients with moderately- to poorly-differentiated testicular cancer (Figure 9). NOX isoform expression is shown for tumour samples only from patients with: moderately- to poorly-differentiated ovarian adenocarcinoma (12 tumour samples, Figure 7), moderately- to poorly-differentiated squamous carcinoma of the head and neck (nine tumour samples, Figure 10), malignant melanoma (13 tumour samples, Figure 11), five samples of chronic myelogenous leukaemia in relapse (Figure 12) and five brain tumours of glioblastoma multiforme sub-type (Figure 13). The horizontal bars in the figures represent the mean values for gene expression relative to 18S rRNA ( $\times 10^{-8}$ ).

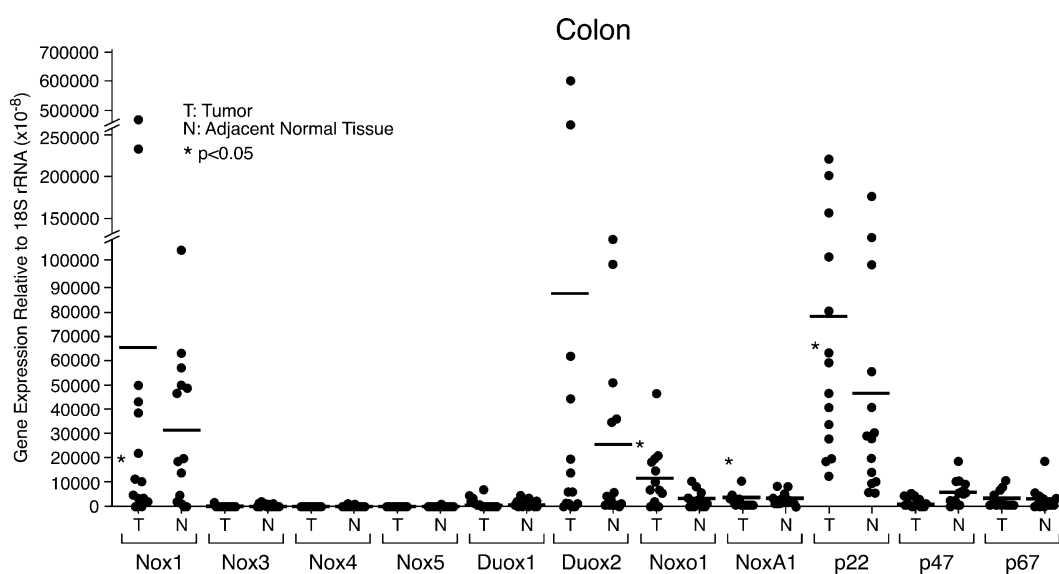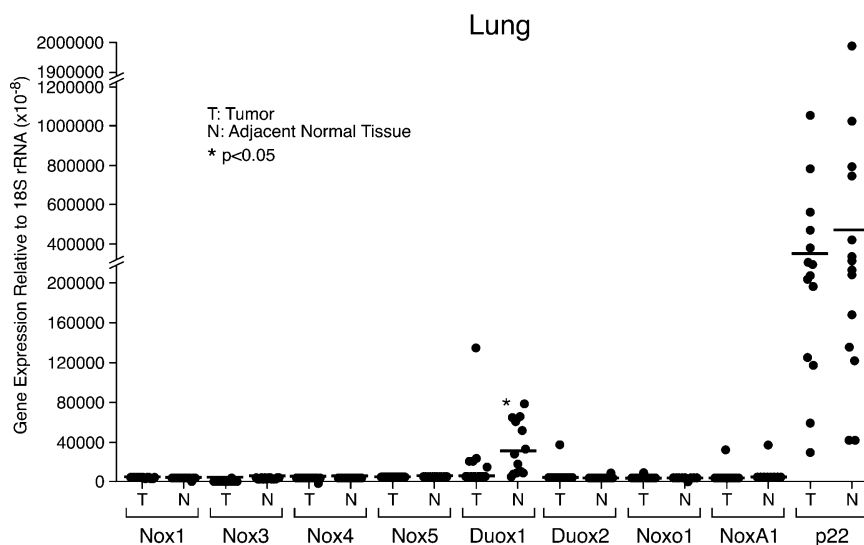

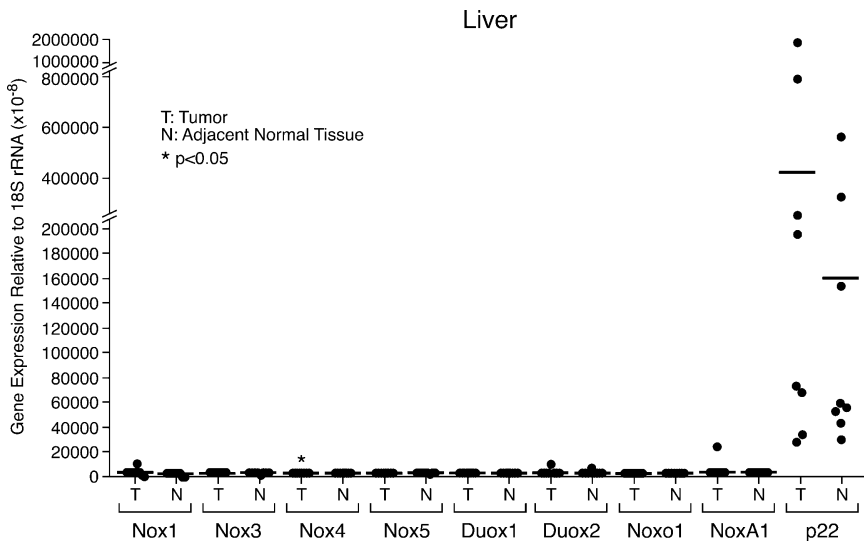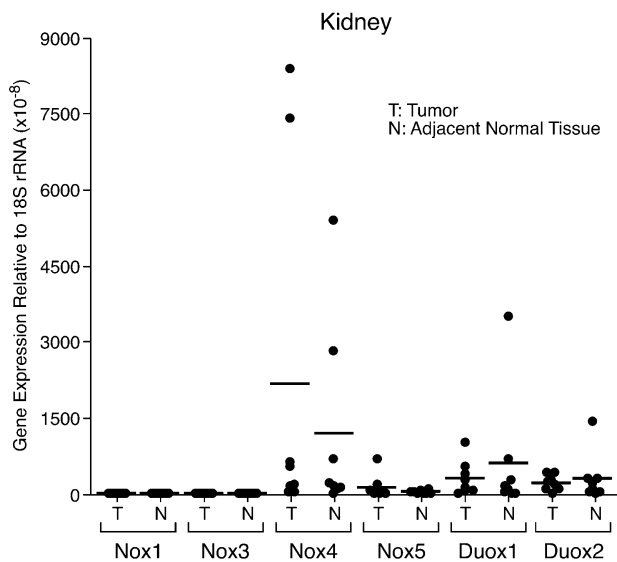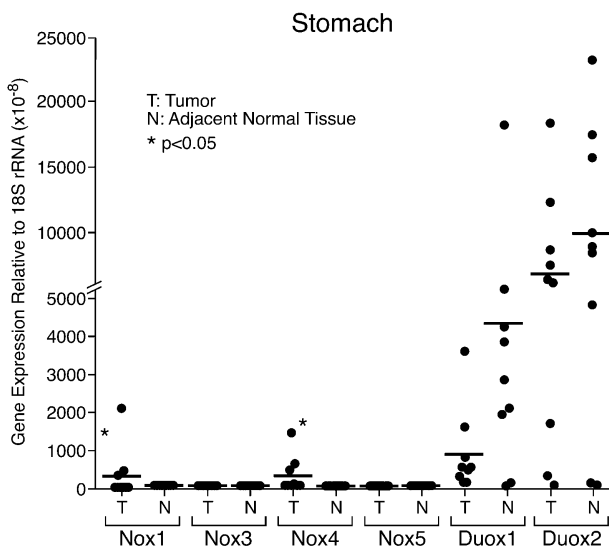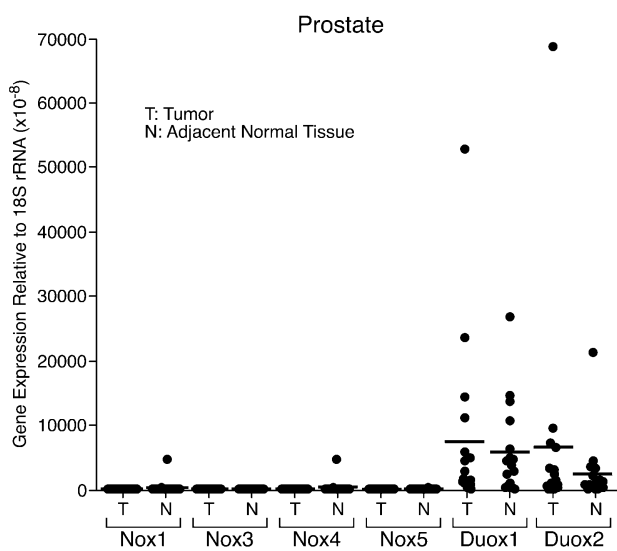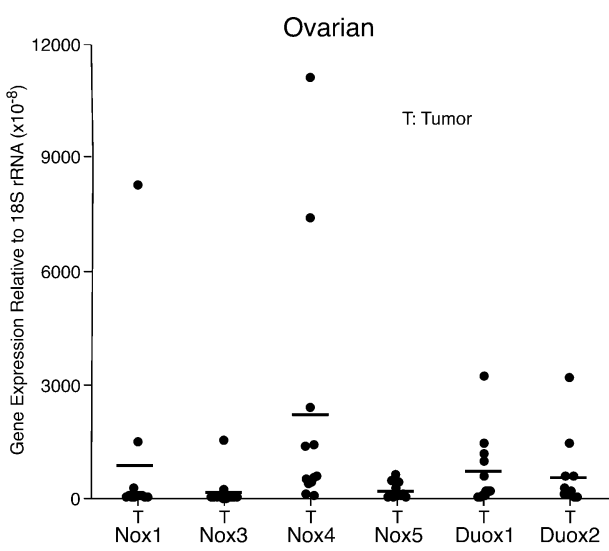

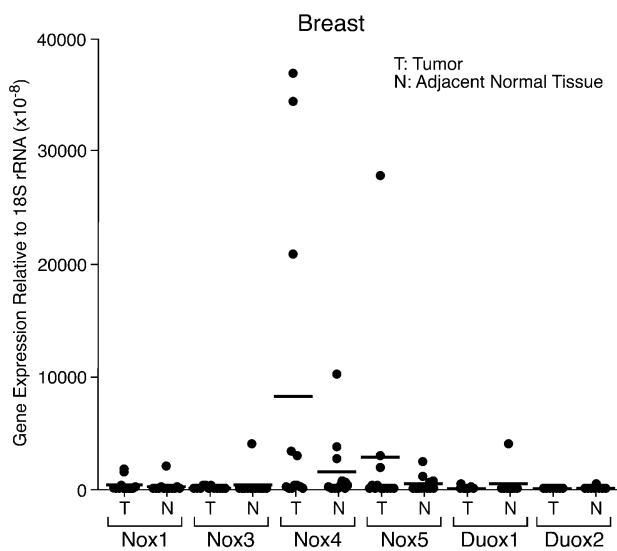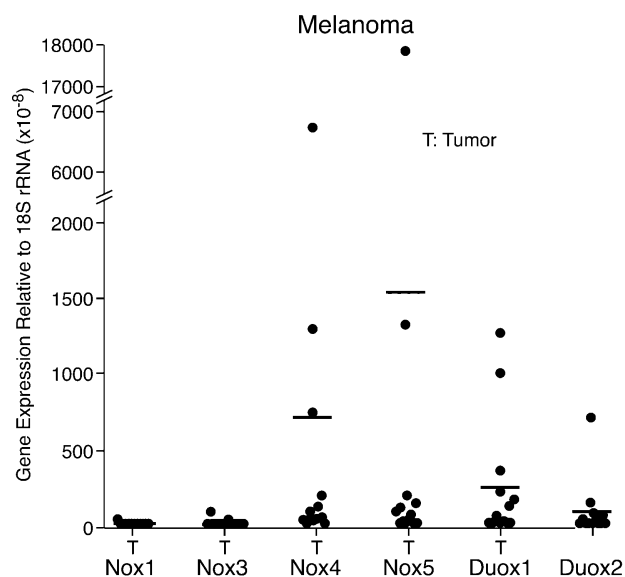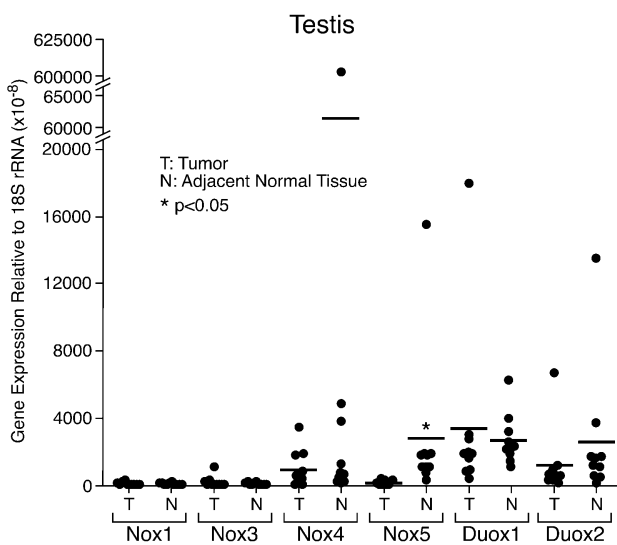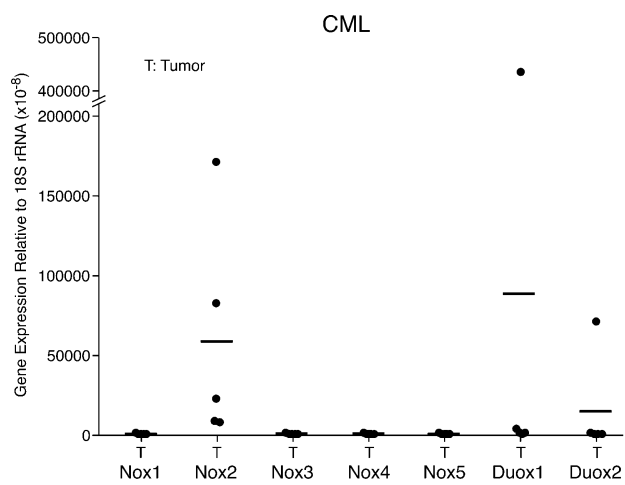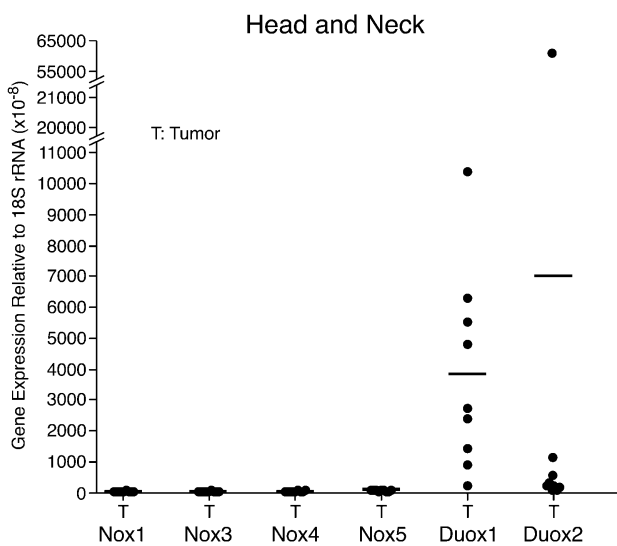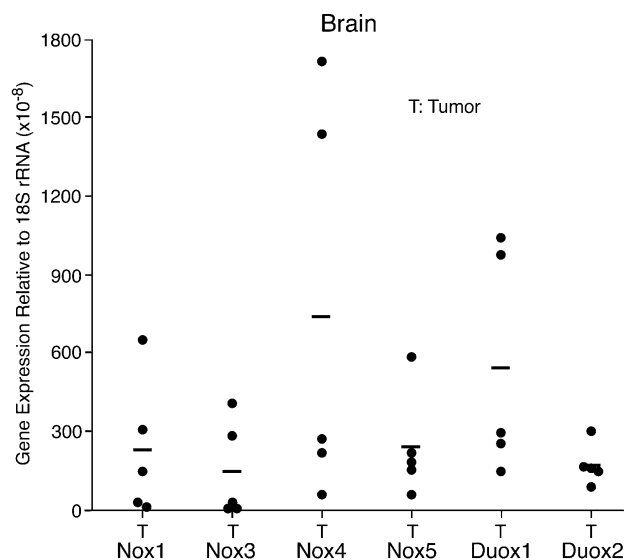

Supplementary Table 1. Comparative analysis of NOX gene expression in tumour samples vs adjacent non-malignant tissue as evaluated using the Mann-Whitney test; samples with  $p < 0.05$  were considered statistically significant (shaded)

| Tumour type | Number Paired Samples | NOX1   | NOX3   | NOX4   | NOX5    | DUOX1  | DUOX2  | NOXO1  | NOXA1  | p22 <sup>phox</sup> | p47 <sup>phox</sup> | p67 <sup>phox</sup> |
|-------------|-----------------------|--------|--------|--------|---------|--------|--------|--------|--------|---------------------|---------------------|---------------------|
| Colorectal  | 14                    | 0.0436 | 0.0849 | 0.8362 | 0.1883  | 0.3783 | 0.9451 | 0.0036 | 0.0490 | 0.0093              | 0.0400              | 0.5050              |
| Stomach     | 9                     | 0.0414 | 0.0188 | 0.0051 | 0.3401  | 0.0770 | 0.4363 |        |        |                     |                     |                     |
| Prostate    | 17                    | 0.4695 | 0.2856 | 0.4695 | 0.7048  | 0.9898 | 0.4602 |        |        |                     |                     |                     |
| Breast      | 12                    | 0.9310 | 0.8852 | 0.6650 | 0.8399  | 0.2319 | 0.6126 |        |        |                     |                     |                     |
| Lung        | 14                    | 0.7652 | 0.6295 | 0.9817 | 0.4764  | 0.0159 | 0.2802 | 0.4363 | 0.3860 | 0.7304              |                     |                     |
| Hepatic     | 8                     | 0.7984 | 0.7882 | 0.0379 | 0.9591  | 0.1949 | 0.4418 | 0.2345 | 0.7984 | 0.5054              |                     |                     |
| Testis      | 10                    | 0.8534 | 0.8534 | 0.3930 | 0.00007 | 0.2176 | 0.1051 |        |        |                     |                     |                     |
| Kidney      | 8                     | 0.2345 | 0.2345 | 0.7984 | 0.4418  | 0.7984 | 0.7984 |        |        |                     |                     |                     |
